# Supplementary material for: Dietary niche breadth influences the effects of urbanization on the gut microbiota of sympatric rodents
Source: PubMed Central journal article supplement (PMC9463044; doi:10.1002/ece3.9216), 2022-09-09
Supplement: ECE3-12-e9216-s002.pdf [file ECE3-12-e9216-s002.pdf]

## Supplementary Material 2

### **Dietary niche breadth influences the effects of urbanization on the gut microbiota of sympatric rodents**

Jason L. Anders<sup>a,b\*</sup>, Alexis M. Mychajliw<sup>c</sup>, Mohamed Abdallah Mohamed Moustafa<sup>d,e</sup>,  
Wessam Mohamed Ahmed Mohamed<sup>d</sup>, Takashi Hayakawa<sup>f,g</sup>, Ryo Nakao<sup>d</sup>, Itsuro Koizumi<sup>f</sup>

<sup>a</sup> Graduate School of Environmental Science, Hokkaido University, N10W5 Sapporo,  
Hokkaido 060-0810, Japan

<sup>b</sup> Center for Ecological and Evolutionary Synthesis (CEES), Department of Biosciences,  
University of Oslo, PO Box 1066. Blindern, 0316 Oslo, Norway

<sup>c</sup> Middlebury College, Departments of Biology and Environmental Studies, 276 Bicentennial  
Way, Middlebury, VT 05753, United States

<sup>d</sup> Laboratory of Parasitology, Graduate School of Infectious Diseases, Faculty of Veterinary  
Medicine, Hokkaido University, N18W9, Sapporo, Hokkaido 060-0818, Japan

<sup>e</sup> Department Animal Medicine, South Valley University, 83523, Egypt,

<sup>f</sup> Faculty of Environmental Earth Science, Hokkaido University, N10W5 Sapporo, Hokkaido  
060-0810, Japan

<sup>g</sup> Japan Monkey Centre, Inuyama, Aichi 484-0081, Japan

\*Corresponding author: Jason L. Anders, E-mail: j.l.anders@ibv.uio.no

## Bacterial Phylum level description

Firmicutes and Bacteroidota were the two most abundant phyla in all three regions of the lower GIT of both host species comprising 80% of all microbes in *A. speciosus* and 90% in *M. rufocanus* in both the natural and urban populations. Campilobacterota was the third most abundant in these same gut regions in *A. speciosus* except in the rectum of urban animals where Proteobacteria was the third most dominant phylum. Spirochaetota was the third most abundant phylum in the cecum, colon, and rectum of *M. rufocanus* with little variation in relative abundance between natural and urban populations. Interestingly, although Firmicutes, Bacteroidota, and Proteobacteria were the three most abundant phyla in the small intestine of *A. speciosus*, Firmicutes was more abundant in the natural habitat with 71% as opposed to 58% in the urban parks, while Bacteroidota showed the opposite trend with 13% and 25% in the natural and urban habitats respectively. A similar but weaker trend was found in *M. rufocanus*; Bacteroidota made up 41% and 54% in the natural and urban sites respectively, while Firmicutes comprised 34% and 26% of all microbes in the natural and urban sites respectively.

## Differential abundance analyses using ANCOM-II

A secondary differential abundance analyses was conducted comparing the relative abundance of microbial genera in each gut region between natural and urban populations using ANCOM-II as described by Kaul et al. (2017) and the R-script written by Lin (2019). We found that few microbial genera exhibited differential abundance between habitat type in either host species (Tables S12, S13). Notably, those genera with a large difference in average relative abundances such as *Tyzerella* (42.87%, 29.19% in natural and urban respectively) and *Lactobacillus* (2.44%, 8.15% averaged in natural and urban respectively) in the small intestine of *A. speciosus* were not identified as differentially abundant (Table S10). This in combination with the significantly different microbial structure between urban and natural habitats based on our beta-diversity analyses (Tables S8, S9) indicate that ANCOM-II may be too conservative an analysis for the present study.

## References

- Kaul A, Mandal S, Davidov O, Peddada SD. (2017) Analysis of Microbiome Data in the Presence of Excess Zeros. *Front Microbiol.* 8, 2114. doi: 10.3389/fmicb.2017.02114
- Frederick Huang Lin (2019) Huanglin/Ancom: Third release of Ancom (v2.1). Zenodo. <https://doi.org/10.5281/zenodo.3577802>

## Supplemental Figures

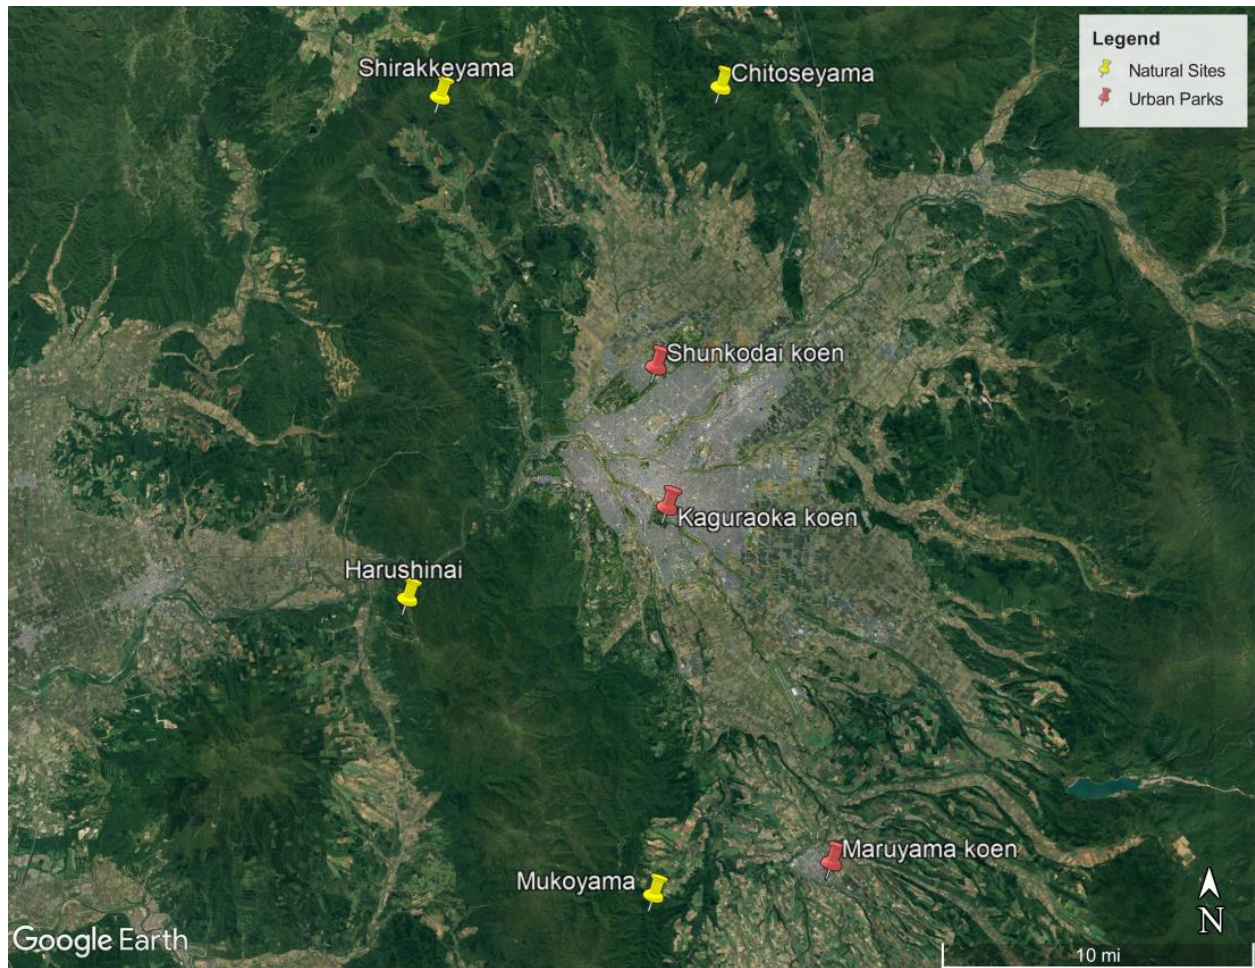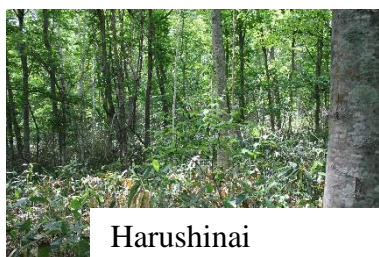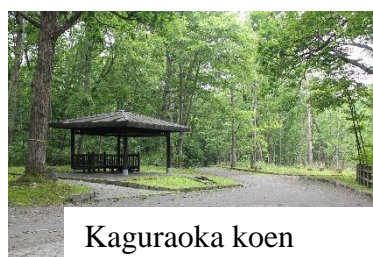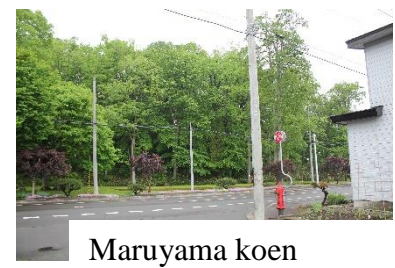

**Figure S1:** A satellite image showing the location of field sites and pictures of three sites (two urban and one natural). The map was created using Google Earth Pro (version 7.3.3, <https://www.google.com/earth/versions/>). Map data: Google, SIO, NOAA, U.S. Navy, NGA, GEBCO, © 2020 ZENRIN Image Landsat/ Copernicus

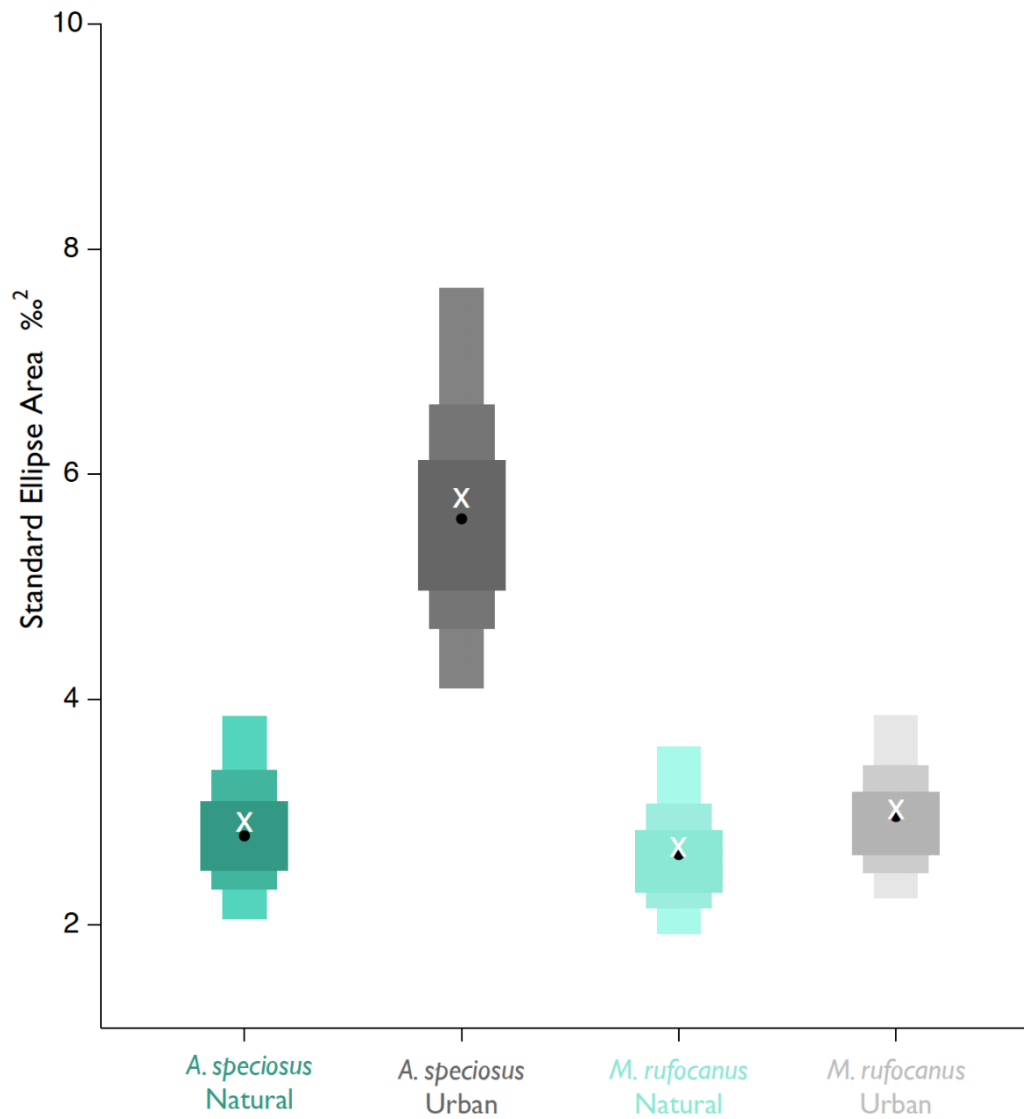

**Figure S2:** Bayesian standard ellipse area (SEA<sub>b</sub>) for each group after 20,000 posterior draws where the boxes indicate 50%, 75%, and 95% confidence intervals and the white X is the maximum likelihood estimate of the small sample size corrected standard ellipse area (SEA<sub>c</sub>).

## Supplemental Tables

| Habitat type | Site           | Latitude       | Longitude       | <i>A. speciosus</i> | <i>M. rufocanus</i> |
|--------------|----------------|----------------|-----------------|---------------------|---------------------|
| Natural      | Chitoseyama    | 43° 56' 30.64" | 142° 24' 10.09" | 6                   | 16                  |
|              | Harushinai     | 43° 42' 19.82" | 142° 12' 08.28" | 5                   | 20                  |
|              | Mukoyama       | 43° 34' 07.41" | 142° 21' 34.57" | 11                  | 3                   |
|              | Shirakkeyama   | 43° 56' 14.15" | 142° 13' 21.56" | 20                  | 4                   |
| Urban        | Kaguraoka koen | 43° 44' 52.24" | 142° 22' 05.94" | 19                  | 13                  |
|              | Shunkodai koen | 43° 48' 45.38" | 142° 21' 40.40" | 16                  | 29                  |
|              | Maruyama koen  | 43° 35' 00.68" | 142° 28' 23.54" | 6                   | 8                   |
| <b>Total</b> |                |                |                 | 83                  | 93                  |

**Table S1:** Site information and number of animals captured at each.

| Species             | Small Intestine |       | Cecum   |       | Colon   |       | Rectum  |       |
|---------------------|-----------------|-------|---------|-------|---------|-------|---------|-------|
|                     | Natural         | Urban | Natural | Urban | Natural | Urban | Natural | Urban |
| <i>A. speciosus</i> | 42              | 39    | 27      | 16    | 41      | 39    | 25      | 16    |
| <i>M. rufocanus</i> | 43              | 49    | 14      | 17    | 38      | 45    | 16      | 16    |
| <b>Total</b>        | 85              | 88    | 41      | 33    | 79      | 84    | 41      | 32    |

**Table S2:** Number of samples per gut region for both *A. speciosus* and *M. rufocanus*.

|                       |                | <i>A. speciosus</i> |                   | <i>M. rufocanus</i> |                   |
|-----------------------|----------------|---------------------|-------------------|---------------------|-------------------|
|                       |                | Natural             | Urban             | Natural             | Urban             |
| $\delta^{13}\text{C}$ | Mean $\pm$ StD | -27.27 $\pm$ 0.60   | -27.35 $\pm$ 1.28 | -25.50 $\pm$ 0.75   | -24.86 $\pm$ 0.70 |
|                       | Min            | -28.4               | -30.59            | -27.36              | -27.02            |
|                       | Max            | -26.02              | -22.90            | -24.08              | -23.20            |
| $\delta^{15}\text{N}$ | Mean $\pm$ StD | 2.53 $\pm$ 1.55     | 3.76 $\pm$ 1.46   | 2.51 $\pm$ 1.17     | 2.22 $\pm$ 1.36   |
|                       | Min            | 0.59                | 1.40              | 0.59                | -0.04             |
|                       | Max            | 6.22                | 6.43              | 6.56                | 6.60              |

**Table S3:** Summary statistics (mean, standard deviation, minimum, maximum) of stable isotopes from natural and urban populations of the two rodent species.

|             | Natural   |           | Urban     |           |
|-------------|-----------|-----------|-----------|-----------|
|             | <i>As</i> | <i>Mr</i> | <i>As</i> | <i>Mr</i> |
| <b>TA</b>   | 8.97      | 11.8      | 22.84     | 15.73     |
| <b>SEA</b>  | 2.83      | 2.61      | 5.63      | 2.95      |
| <b>SEAc</b> | 2.9       | 2.68      | 5.77      | 3.01      |

**Table S4:** Estimates of isotopic niche width as measured in per mil (‰) for total area (TA), standard ellipse area (SEA), and small sample size corrected SEA (SEAc) of natural and urban populations of *A. speciosus* (*As*) and *M. rufocanus* (*Mr*).

| Gut region      | Variable              | <i>A. speciosus</i> |           |                 | <i>M. rufocanus</i> |           |                 |
|-----------------|-----------------------|---------------------|-----------|-----------------|---------------------|-----------|-----------------|
|                 |                       | <b>b</b>            | <b>SE</b> | <b><i>p</i></b> | <b>b</b>            | <b>SE</b> | <b><i>p</i></b> |
| Small Intestine | Habitat type (Urban)  | 0.203               | 0.148     | 0.229           | 0.159               | 0.12      | 0.244           |
|                 | Sex (Male)            | 0.181               | 0.139     | 0.198           | -0.032              | 0.117     | 0.787           |
|                 | Age                   | -0.066              | 0.153     | 0.665           | -0.329              | 0.125     | <b>0.01</b>     |
|                 | $\delta^{13}\text{C}$ | -0.015              | 0.072     | 0.839           | -0.22               | 0.077     | <b>0.006</b>    |
|                 | $\delta^{15}\text{N}$ | -0.053              | 0.048     | 0.272           | 0.03                | 0.044     | 0.495           |
| Cecum           | Habitat type (Urban)  | 0.028               | 0.137     | 0.843           | -0.081              | 0.184     | 0.676           |
|                 | Sex (Male)            | 0.194               | 0.066     | <b>0.006</b>    | 0.016               | 0.093     | 0.867           |
|                 | Age                   | -0.075              | 0.092     | 0.417           | -0.179              | 0.095     | 0.075           |
|                 | $\delta^{13}\text{C}$ | 0.03                | 0.032     | 0.363           | -0.124              | 0.054     | <b>0.032</b>    |
|                 | $\delta^{15}\text{N}$ | -0.029              | 0.024     | 0.229           | 0.043               | 0.034     | 0.224           |
| Colon           | Habitat type (Urban)  | -0.001              | 0.055     | 0.988           | 0.06                | 0.056     | 0.335           |
|                 | Sex (Male)            | 0.123               | 0.041     | <b>0.003</b>    | -0.054              | 0.039     | 0.163           |
|                 | Age                   | 0.079               | 0.046     | 0.088           | -0.092              | 0.042     | <b>0.029</b>    |
|                 | $\delta^{13}\text{C}$ | -0.022              | 0.026     | 0.399           | -0.038              | 0.027     | 0.16            |
|                 | $\delta^{15}\text{N}$ | 0.008               | 0.015     | 0.587           | 0.037               | 0.015     | <b>0.016</b>    |
| Rectum          | Habitat type (Urban)  | -0.028              | 0.091     | 0.771           | -0.075              | 0.096     | 0.472           |
|                 | Sex (Male)            | 0.239               | 0.065     | <b>0.001</b>    | -0.102              | 0.064     | 0.131           |
|                 | Age                   | 0.103               | 0.086     | 0.244           | -0.038              | 0.064     | 0.56            |
|                 | $\delta^{13}\text{C}$ | 0.024               | 0.03      | 0.426           | -0.116              | 0.034     | <b>0.003</b>    |
|                 | $\delta^{15}\text{N}$ | 0.019               | 0.023     | 0.428           | 0.046               | 0.021     | <b>0.044</b>    |

**Table S5:** Linear mixed effects model comparing ASV abundance diversity of the gut microbiome within each gut region between natural and urban populations. Bolded values indicate significance.

| Gut region      | Variable              | A. speciosus |       |              | M. rufocanus |       |              |
|-----------------|-----------------------|--------------|-------|--------------|--------------|-------|--------------|
|                 |                       | b            | SE    | p            | b            | SE    | p            |
| Small Intestine | Habitat type (Urban)  | 0.057        | 0.109 | 0.623        | -0.017       | 0.065 | 0.807        |
|                 | Sex (Male)            | 0.09         | 0.075 | 0.236        | -0.01        | 0.056 | 0.863        |
|                 | Age                   | -0.115       | 0.084 | 0.175        | -0.108       | 0.061 | 0.083        |
|                 | $\delta^{13}\text{C}$ | -0.016       | 0.041 | 0.698        | -0.046       | 0.038 | 0.222        |
|                 | $\delta^{15}\text{N}$ | -0.034       | 0.026 | 0.189        | -0.008       | 0.021 | 0.707        |
| Cecum           | Habitat type (Urban)  | -0.047       | 0.082 | 0.591        | -0.063       | 0.084 | 0.484        |
|                 | Sex (Male)            | 0.068        | 0.03  | <b>0.029</b> | 0.011        | 0.048 | 0.828        |
|                 | Age                   | -0.072       | 0.041 | 0.091        | -0.096       | 0.049 | 0.067        |
|                 | $\delta^{13}\text{C}$ | 0.017        | 0.015 | 0.253        | -0.069       | 0.028 | <b>0.023</b> |
|                 | $\delta^{15}\text{N}$ | -0.005       | 0.011 | 0.674        | 0.029        | 0.018 | 0.119        |
| Colon           | Habitat type (Urban)  | -0.024       | 0.031 | 0.472        | 0.008        | 0.028 | 0.785        |
|                 | Sex (Male)            | 0.041        | 0.021 | 0.058        | -0.026       | 0.022 | 0.252        |
|                 | Age                   | -0.005       | 0.024 | 0.844        | -0.069       | 0.024 | <b>0.005</b> |
|                 | $\delta^{13}\text{C}$ | 0.001        | 0.014 | 0.969        | -0.033       | 0.015 | <b>0.035</b> |
|                 | $\delta^{15}\text{N}$ | 0.009        | 0.008 | 0.242        | 0.021        | 0.009 | <b>0.019</b> |
| Rectum          | Habitat type (Urban)  | -0.039       | 0.055 | 0.513        | -0.09        | 0.042 | 0.085        |
|                 | Sex (Male)            | 0.082        | 0.032 | <b>0.016</b> | -0.018       | 0.032 | 0.577        |
|                 | Age                   | 0.014        | 0.043 | 0.745        | -0.051       | 0.032 | 0.133        |
|                 | $\delta^{13}\text{C}$ | 0.011        | 0.015 | 0.472        | -0.047       | 0.017 | <b>0.015</b> |
|                 | $\delta^{15}\text{N}$ | 0.006        | 0.012 | 0.627        | 0.035        | 0.011 | <b>0.004</b> |

**Table S6:** Linear mixed effects model comparing Faith's phylogenetic diversity of the gut microbiome within each gut region between natural and urban populations. Bolded values indicate significance.

| Gut region      | Dissimilarity index | <i>A. speciosus</i> |         |        |          | <i>M. rufocanus</i> |         |        |              |
|-----------------|---------------------|---------------------|---------|--------|----------|---------------------|---------|--------|--------------|
|                 |                     | SS                  | $\mu^2$ | F      | <i>p</i> | SS                  | $\mu^2$ | F      | <i>p</i>     |
| Small Intestine | Unweighted unfrac   | 0                   | 0       | 0.0012 | 0.975    | 0.0147              | 0.0147  | 4.0267 | <b>0.039</b> |
|                 | Weighted unfrac     | 0.0266              | 0.0266  | 1.6628 | 0.213    | 0.0509              | 0.0509  | 2.5048 | 0.109        |
| Cecum           | Unweighted unfrac   | 0.0066              | 0.0066  | 3.1382 | 0.082    | 0.0004              | 0.0004  | 0.3016 | 0.599        |
|                 | Weighted unfrac     | 0                   | 0       | 0.0013 | 0.974    | 0.0012              | 0.0012  | 0.3888 | 0.549        |
| Colon           | Unweighted unfrac   | 0                   | 0       | 0.009  | 0.935    | 0.0002              | 0.0002  | 0.0944 | 0.756        |
|                 | Weighted unfrac     | 0                   | 0       | 0.0022 | 0.971    | 0.0066              | 0.0066  | 1.83   | 0.169        |
| Rectum          | Unweighted unfrac   | 0.0057              | 0.0057  | 2.5459 | 0.118    | 0                   | 0       | 0.0243 | 0.88         |
|                 | Weighted unfrac     | 0.0001              | 0.0001  | 0.0159 | 0.901    | 0.0001              | 0.0001  | 0.027  | 0.882        |

**Table S7:** PERMDISP results comparing the level of within habitat type dispersion of the gut microbial community. Bolded values indicate significance.



| Dissimilarity index | Variable          | Small Intestine |                |        |              | Cecum  |                |        |              |
|---------------------|-------------------|-----------------|----------------|--------|--------------|--------|----------------|--------|--------------|
|                     |                   | SS              | R <sup>2</sup> | F      | <i>p</i>     | SS     | R <sup>2</sup> | F      | <i>p</i>     |
| Unweighted Unifrac  | Habitat type      | 0.2468          | 0.0238         | 1.8441 | <b>0.026</b> | 0.1872 | 0.0483         | 2.1116 | <b>0.003</b> |
|                     | Sex               | 0.1861          | 0.018          | 1.3906 | 0.097        | 0.0825 | 0.0212         | 0.9299 | 0.568        |
|                     | Age               | 0.1735          | 0.0167         | 1.2967 | 0.14         | 0.0965 | 0.0249         | 1.0879 | 0.283        |
|                     | δ <sup>13</sup> C | 0.1161          | 0.0112         | 0.8678 | 0.606        | 0.1061 | 0.0273         | 1.1968 | 0.183        |
|                     | δ <sup>15</sup> N | 0.125           | 0.0121         | 0.9338 | 0.464        | 0.0806 | 0.0208         | 0.9093 | 0.639        |
| Weighted Unifrac    | Habitat type      | 0.2383          | 0.0299         | 2.303  | <b>0.04</b>  | 0.0616 | 0.0243         | 1.0755 | 0.36         |
|                     | Sex               | 0.0755          | 0.0095         | 0.73   | 0.624        | 0.0598 | 0.0236         | 1.0438 | 0.375        |
|                     | Age               | 0.0932          | 0.0117         | 0.901  | 0.484        | 0.1548 | 0.0611         | 2.7049 | <b>0.016</b> |
|                     | δ <sup>13</sup> C | 0.0868          | 0.0109         | 0.8385 | 0.495        | 0.0475 | 0.0188         | 0.8305 | 0.565        |
|                     | δ <sup>15</sup> N | 0.0399          | 0.005          | 0.3859 | 0.909        | 0.0378 | 0.0149         | 0.6602 | 0.75         |
| Dissimilarity       | Variable          | Colon           |                |        |              | Rectum |                |        |              |
|                     |                   | SS              | R <sup>2</sup> | F      | <i>p</i>     | SS     | R <sup>2</sup> | F      | <i>p</i>     |
| Unweighted Unifrac  | Habitat type      | 0.2481          | 0.0347         | 2.8492 | <b>0.001</b> | 0.186  | 0.0472         | 1.9672 | <b>0.002</b> |
|                     | Sex               | 0.1087          | 0.0152         | 1.2479 | 0.111        | 0.1132 | 0.0287         | 1.1967 | 0.172        |
|                     | Age               | 0.1683          | 0.0235         | 1.9331 | <b>0.001</b> | 0.1198 | 0.0304         | 1.2671 | 0.129        |
|                     | δ <sup>13</sup> C | 0.154           | 0.0215         | 1.7692 | <b>0.005</b> | 0.1012 | 0.0257         | 1.0699 | 0.327        |
|                     | δ <sup>15</sup> N | 0.0858          | 0.012          | 0.9858 | 0.482        | 0.0771 | 0.0196         | 0.8154 | 0.805        |
| Weighted Unifrac    | Habitat type      | 0.2153          | 0.038          | 3.1725 | <b>0.004</b> | 0.1175 | 0.0423         | 1.7684 | 0.078        |
|                     | Sex               | 0.1349          | 0.0238         | 1.9883 | <b>0.036</b> | 0.1205 | 0.0434         | 1.8133 | 0.071        |
|                     | Age               | 0.2767          | 0.0488         | 4.0775 | <b>0.001</b> | 0.109  | 0.0393         | 1.6408 | 0.098        |
|                     | δ <sup>13</sup> C | 0.1             | 0.0176         | 1.4741 | 0.141        | 0.0515 | 0.0186         | 0.7753 | 0.62         |
|                     | δ <sup>15</sup> N | 0.0716          | 0.0126         | 1.0559 | 0.358        | 0.0651 | 0.0235         | 0.9796 | 0.442        |

**Table S8:** PERMANOVA results comparing the gut microbiome of the different gut regions between natural and urban populations of *A. speciosus*. Bolded values indicate significance.

| Dissimilarity index | Variable          | Small Intestine |                |        |              | Cecum  |                |        |              |
|---------------------|-------------------|-----------------|----------------|--------|--------------|--------|----------------|--------|--------------|
|                     |                   | SS              | R <sup>2</sup> | F      | <i>p</i>     | SS     | R <sup>2</sup> | F      | <i>p</i>     |
| Unweighted Unifrac  | Habitat type      | 0.2815          | 0.0255         | 2.3093 | <b>0.002</b> | 0.1287 | 0.0469         | 1.454  | <b>0.046</b> |
|                     | Sex               | 0.0867          | 0.0079         | 0.7113 | 0.905        | 0.0984 | 0.0359         | 1.1119 | 0.233        |
|                     | Age               | 0.2114          | 0.0192         | 1.7346 | <b>0.024</b> | 0.1315 | 0.048          | 1.4855 | <b>0.035</b> |
|                     | δ <sup>13</sup> C | 0.3657          | 0.0332         | 3.0002 | <b>0.001</b> | 0.2389 | 0.0872         | 2.7    | <b>0.001</b> |
|                     | δ <sup>15</sup> N | 0.1406          | 0.0128         | 1.1532 | 0.203        | 0.1415 | 0.0516         | 1.5994 | <b>0.013</b> |
| Weighted Unifrac    | Habitat type      | 0.7677          | 0.0505         | 4.5194 | <b>0.009</b> | 0.0857 | 0.068          | 2.0661 | <b>0.039</b> |
|                     | Sex               | 0.113           | 0.0074         | 0.6652 | 0.6          | 0.0666 | 0.0528         | 1.6051 | 0.113        |
|                     | Age               | 0.2801          | 0.0184         | 1.649  | 0.144        | 0.0715 | 0.0568         | 1.725  | 0.074        |
|                     | δ <sup>13</sup> C | 0.4957          | 0.0326         | 2.9186 | <b>0.03</b>  | 0.0735 | 0.0583         | 1.7714 | 0.086        |
|                     | δ <sup>15</sup> N | 0.1435          | 0.0094         | 0.845  | 0.462        | 0.0382 | 0.0303         | 0.9203 | 0.507        |
| Dissimilarity       | Variable          | Colon           |                |        |              | Rectum |                |        |              |
|                     |                   | SS              | R <sup>2</sup> | F      | <i>p</i>     | SS     | R <sup>2</sup> | F      | <i>p</i>     |
| Unweighted Unifrac  | Habitat type      | 0.1915          | 0.0266         | 2.2349 | <b>0.001</b> | 0.1269 | 0.0487         | 1.5046 | <b>0.037</b> |
|                     | Sex               | 0.1145          | 0.0159         | 1.3367 | 0.058        | 0.1134 | 0.0435         | 1.345  | 0.076        |
|                     | Age               | 0.1435          | 0.0199         | 1.6747 | <b>0.011</b> | 0.118  | 0.0453         | 1.3996 | 0.052        |
|                     | δ <sup>13</sup> C | 0.23            | 0.0319         | 2.6839 | <b>0.001</b> | 0.2145 | 0.0824         | 2.5438 | <b>0.001</b> |
|                     | δ <sup>15</sup> N | 0.141           | 0.0196         | 1.6449 | <b>0.007</b> | 0.125  | 0.048          | 1.4815 | <b>0.039</b> |
| Weighted Unifrac    | Habitat type      | 0.1296          | 0.0344         | 2.7989 | <b>0.014</b> | 0.0892 | 0.0678         | 2.0539 | 0.064        |
|                     | Sex               | 0.0424          | 0.0113         | 0.9164 | 0.453        | 0.099  | 0.0752         | 2.2793 | <b>0.04</b>  |
|                     | Age               | 0.0744          | 0.0198         | 1.6077 | 0.109        | 0.0598 | 0.0454         | 1.3761 | 0.203        |
|                     | δ <sup>13</sup> C | 0.035           | 0.0093         | 0.755  | 0.618        | 0.0697 | 0.053          | 1.6049 | 0.137        |
|                     | δ <sup>15</sup> N | 0.0363          | 0.0096         | 0.7837 | 0.608        | 0.0212 | 0.0161         | 0.4876 | 0.883        |

**Table S9:** PERMANOVA results comparing the gut microbiome of the different gut regions between natural and urban populations of *M. rufocanus*. Bolded values indicate significance

| <i>A. speciosus</i> |                               |                             |      |                             |      |
|---------------------|-------------------------------|-----------------------------|------|-----------------------------|------|
| Gut region          | Microbial genus               | Natural                     |      | Urban                       |      |
|                     |                               | Avg. relative abundance (%) | LDA  | Avg. relative abundance (%) | LDA  |
| Small Intestine     | Tyzzereella                   | 42.87                       | 4.83 | 29.19                       |      |
|                     | Mycoplasma                    | 10.4                        | 4.62 | 1.97                        |      |
|                     | Lactobacillus                 | 2.44                        |      | 8.15                        | 4.53 |
|                     | Mucispirillum                 | 0.04                        | 3.55 | 0.02                        |      |
|                     | Oscillospirales UCG_010       | < 0.01                      |      | 0.01                        | 3.54 |
|                     | Prevotellaceae UCG_003        | 0.10                        | 2.73 | < 0.01                      |      |
|                     | Bifidobacterium               | 0                           |      | 0.01                        | 2.63 |
|                     | Pseudomonas                   | 0.07                        | 2.59 | < 0.01                      |      |
|                     | Ochrobactrum                  | 0                           |      | < 0.01                      | 2.38 |
|                     | Lachnospiraceae GCA_900066575 | < 0.01                      |      | 0.02                        | 2.11 |
|                     | Lachnospiraceae UCG_006       | < 0.01                      |      | 0.03                        | 2.11 |
|                     | Providencia                   | < 0.01                      | 2.07 | 0                           |      |
|                     | Ruminococcus                  | 0.01                        |      | 0.03                        | 2.07 |
|                     | Desulfovibrio                 | 0.01                        |      | 0.03                        | 2.05 |
|                     | Lachnospiraceae NC2004 group  | 0                           |      | 0.02                        | 2    |
| Cecum               | Prevotellaceae UCG_003        | 2.77                        | 4.18 | 0.09                        |      |
|                     | Treponema                     | 2.07                        | 4.02 | 0.47                        |      |
|                     | Escherichia-Shigella          | 1.23                        |      | 2.9                         | 3.97 |
|                     | Mycoplasma                    | 1.88                        | 3.92 | 0.29                        |      |
|                     | Prevotellaceae Ga6A1 group    | 1.75                        | 3.81 | 0.64                        |      |
|                     | Lachnospiraceae UCG_001       | 0.03                        |      | 0.19                        | 2.91 |
|                     | Cerasicoccus                  | 0.03                        |      | 0.17                        | 2.64 |
|                     | Butyricoccus                  | 0.04                        |      | 0.07                        | 2.27 |

**Table S10:** More abundant bacterial genera in the a) small intestine, b) cecum, c) colon, d) and rectum of *A. speciosus* in the natural and urban habitats based on LEfSe analysis.

| <i>A. speciosus</i> |                                        |                             |      |                             |      |
|---------------------|----------------------------------------|-----------------------------|------|-----------------------------|------|
| Gut region          | Microbial genus                        | Natural                     |      | Urban                       |      |
|                     |                                        | Avg. Relative Abundance (%) | LDA  | Avg. Relative Abundance (%) | LDA  |
| Colon               | Mycoplasma                             | 2.4                         | 3.99 | 0.511                       |      |
|                     | Prevotellaceae UCG_003                 | 1.57                        | 3.87 | 0.1                         |      |
|                     | Prevotellaceae Ga6A1 group             | 1.47                        | 3.63 | 0.82                        |      |
|                     | Mucispirillum                          | 1.56                        | 3.62 | 0.89                        |      |
|                     | Treponema                              | 1.08                        | 3.58 | 0.49                        |      |
|                     | Bifidobacterium                        | 0                           |      | < 0.01                      | 3.43 |
|                     | Anaerostipes                           | 0                           |      | 0.29                        | 3.13 |
|                     | Faecalibaculum                         | < 0.01                      |      | 0.07                        | 2.6  |
|                     | Parasutterella                         | 0.04                        |      | 0.1                         | 2.49 |
|                     | Butyricoccus                           | 0.029                       |      | 0.09                        | 2.49 |
|                     | Frisingicoccus                         | 0                           |      | < 0.01                      | 2.05 |
|                     | Oscillospiraceae NK4A214 group         | 0.02                        |      | 0.05                        | 2.05 |
| Rectum              | Prevotellaceae UCG_003                 | 2.94                        | 4.16 | 0.01                        |      |
|                     | Prevotellaceae Ga6A1 group             | 2.26                        | 3.9  | 0.78                        |      |
|                     | Treponema                              | 1.55                        | 3.81 | 0.22                        |      |
|                     | Mucispirillum                          | 1.22                        | 3.55 | 0.51                        |      |
|                     | Ruminococcus                           | 0.75                        |      | 0.68                        | 3.48 |
|                     | Anaerostipes                           | 0                           |      | 0.71                        | 3.35 |
|                     | Lachnospiraceae UCG_001                | 0.03                        |      | 0.22                        | 3.07 |
|                     | Oscillospiraceae UCG_005               | 0                           |      | < 0.01                      | 2.61 |
|                     | Lachnoclostridium                      | 0.03                        |      | 0.06                        | 2.26 |
|                     | Anaerovoracaceae, Family XIII, UCG_001 | 0                           |      | < 0.01                      | 2.07 |

**Table S10 (cont.):** More abundant bacterial genera in the a) small intestine, b) cecum, c) colon, d) and rectum of *A. speciosus* in the natural and urban habitats based on LEfSe analysis.

| <i>M. rufocanus</i>      |                                       |                             |        |                             |      |
|--------------------------|---------------------------------------|-----------------------------|--------|-----------------------------|------|
| Gut region               | Microbial genus                       | Natural                     |        | Urban                       |      |
|                          |                                       | Avg. relative abundance (%) | LDA    | Avg. relative abundance (%) | LDA  |
| Small Intestine          | Ureaplasma                            | 9.84                        | 4.44   | 4.18                        |      |
|                          | Helicobacter                          | 3.5                         | 4.2    | 0.18                        |      |
|                          | Campylobacteria                       | 0.2                         | 4.2    | < 0.01                      |      |
|                          | Mycoplasma                            | 4.89                        | 4.07   | 4.47                        |      |
|                          | Exiguobacterium                       | 0.01                        | 3.8    | < 0.01                      |      |
|                          | Coxiella                              | 0.04                        | 3.57   | 0.01                        |      |
|                          | Mucispirillum                         | 0.02                        | 3.22   | < 0.01                      |      |
|                          | Escherichia-Shigella                  | 0.42                        | 3.19   | 0.24                        |      |
|                          | Monoglobus                            | < 0.01                      |        | 0.03                        | 3.17 |
|                          | Ehrlichia                             | 0.08                        | 3.14   | 0                           |      |
|                          | Staphylococcus                        | 0.01                        | 3.12   | < 0.01                      |      |
|                          | Candidatus Lariskella                 | 0.01                        | 2.76   | < 0.01                      |      |
|                          | Methylobacterium-Methylorubrum        | 0                           |        |                             | 2.21 |
|                          | Lachnoclostridium                     | < 0.01                      |        | 0.01                        | 2.12 |
| Oscillibacter            | 0.02                                  | 2.09                        | 0.01   |                             |      |
| Oscillospiraceae UCG_005 | 0.01                                  | 2.02                        | < 0.01 |                             |      |
| Cecum                    | Alistipes                             | 2.23                        | 3.73   | 1.3                         |      |
|                          | Odoribacter                           | 0.88                        | 3.49   | 0.32                        |      |
|                          | Colidextribacter                      | 0.99                        |        | 1.28                        | 3.24 |
|                          | Erysipelatoclostridiaceae UCG_004     | 0.01                        | 3.21   | < 0.01                      |      |
|                          | Eubacterium xylanophilum group        | 0.31                        | 3.13   | 0.08                        |      |
|                          | Anaerovoracaceae, Family XIII, AD3011 | 0.02                        | 3.02   | < 0.01                      |      |
|                          | Desulfovibrio                         | 0.21                        |        | 0.35                        | 2.95 |
|                          | Lachnospiraceae, FCS020 group         | < 0.01                      |        | 0.03                        | 2.89 |
|                          | Tuzzerella                            | 0.15                        | 2.81   | 0.04                        |      |
|                          | Oscillospiraceae UCG_005              | 0.08                        | 2.8    | 0.05                        |      |
|                          | Lachnospiraceae, NK4B4 group          | < 0.01                      |        | 0.06                        | 2.73 |
| Blautia                  | < 0.01                                |                             | 0.03   | 2.73                        |      |

**Table S11:** More abundant bacterial genera in the a) small intestine, b) cecum, c) colon, d) and rectum of *M. rufocanus* in the natural and urban habitats based on LEfSe analysis.

| <i>M. rufocanus</i> |                                       |                             |      |                             |      |
|---------------------|---------------------------------------|-----------------------------|------|-----------------------------|------|
| Gut region          | Microbial genus                       | Natural                     |      | Urban                       |      |
|                     |                                       | Avg. relative abundance (%) | LDA  | Avg. relative abundance (%) | LDA  |
| Colon               | Lachnospiraceae, NK4A136 group        | 5.26                        |      | 7.85                        | 4.08 |
|                     | Helicobacter                          | 1.42                        |      | 2.48                        | 3.78 |
|                     | Alistipes                             | 2.94                        | 3.68 | 2.01                        |      |
|                     | Odoribacter                           | 0.98                        | 3.32 | 0.47                        |      |
|                     | Gastranaerophilales                   | 0.87                        | 3.15 | 0.6                         |      |
|                     | Eubacterium xylanophilum group        | 0.31                        | 3.04 | 0.1                         |      |
|                     | Allobaculum                           | < 0.01                      |      | 0.16                        | 2.91 |
|                     | Mucispirillum                         | 0.31                        | 2.85 | 0.21                        |      |
|                     | Erysipelatoclostridiaceae UCG_004     | 0.01                        | 2.67 | < 0.01                      |      |
|                     | Intestinimonas                        | 0.19                        |      | 0.25                        | 2.46 |
|                     | Peptococcus                           | 0.11                        | 2.35 | 0.07                        |      |
|                     | Tuzzerella                            | 0.06                        | 2.3  | 0.02                        |      |
|                     | Lachnospiraceae, NK4B4 group          | 0.04                        |      | 0.07                        | 2.22 |
|                     | Anaerovorax                           | < 0.01                      | 2.07 | 0                           |      |
|                     | Oscillospiraceae UCG_005              | 0.05                        | 2.04 | 0.03                        |      |
| Rectum              | Ruminococcus                          | 1.57                        | 3.69 | 0.53                        |      |
|                     | Eubacterium xylanophilum group        | 1.05                        | 3.68 | 0.14                        |      |
|                     | Peptococcus                           | 0.18                        | 2.68 | 0.09                        |      |
|                     | Oscillospiraceae UCG_005              | 0.12                        | 2.67 | 0.03                        |      |
|                     | Anaerovoracaceae, Family XIII, AD3011 | 0.03                        | 2.54 | < 0.01                      |      |
|                     | Lachnospiraceae, NK4B4 group          | 0.05                        |      | 0.09                        | 2.38 |
|                     | Tuzzerella                            | 0.05                        | 2.32 | 0.02                        |      |
|                     | Bilophila                             | 0.02                        | 2.2  | < 0.01                      |      |

**Table S11 (cont.):** More abundant bacterial genera in the a) small intestine, b) cecum, c) colon, d) and rectum of *M. rufocanus* in the natural and urban habitats based on LEfSe analysis.

| <i>A. speciosus</i> |                            |    |               |       |      |      |
|---------------------|----------------------------|----|---------------|-------|------|------|
| Gut Region          | Genus                      | W  | cut-off value |       |      |      |
|                     |                            |    | 0.9           | 0.8   | 0.7  | 0.6  |
| Small Intestine     | Spirochaetaceae            | 74 | FALSE         | FALSE | TRUE | TRUE |
| Cecum               | Prevotellaceae Ga6A1 group | 74 | FALSE         | TRUE  | TRUE | TRUE |
| Cecum               | Treponema                  | 87 | TRUE          | TRUE  | TRUE | TRUE |
| Colon               | Treponema                  | 93 | TRUE          | TRUE  | TRUE | TRUE |
| Rectum              | Prevotellaceae Ga6A1 group | 76 | FALSE         | FALSE | TRUE | TRUE |
| Rectum              | Treponema                  | 92 | TRUE          | TRUE  | TRUE | TRUE |

**Table S12:** Differentially abundant microbial genera between natural and urban populations of *A. speciosus* using ANCOM-II. Cutoff values indicate less conservative (0.6) to more conservative (0.9) analysis in terms of controlling for false discovery rate. TRUE indicates differential abundance and FALSE indicates no differential abundance.

| <i>M. rufocanus</i> |                              |    |               |       |      |      |
|---------------------|------------------------------|----|---------------|-------|------|------|
| Gut Region          | Genus                        | W  | cut-off value |       |      |      |
|                     |                              |    | 0.9           | 0.8   | 0.7  | 0.6  |
| Small Intestine     | Eggerthellaceae              | 71 | FALSE         | TRUE  | TRUE | TRUE |
| Small Intestine     | Christensenellaceae          | 71 | FALSE         | TRUE  | TRUE | TRUE |
| Small Intestine     | Coxiella                     | 80 | TRUE          | TRUE  | TRUE | TRUE |
| Cecum               | Lachnospiraceae FCS020 group | 77 | FALSE         | FALSE | TRUE | TRUE |
| Cecum               | Lachnospiraceae NK4B4 group  | 77 | FALSE         | FALSE | TRUE | TRUE |
| Colon               | Rs-E47 termite group         | 96 | TRUE          | TRUE  | TRUE | TRUE |
| Colon               | Tuzzerella                   | 77 | FALSE         | FALSE | TRUE | TRUE |
| Rectum              | xylanophilumgroup            | 71 | FALSE         | FALSE | TRUE | TRUE |

**Table S13:** Differentially abundant microbial genera between natural and urban populations of *M. rufocanus* using ANCOM-II. Cutoff values indicate less conservative (0.6) to more conservative (0.9) analysis in terms of controlling for false discovery rate. TRUE indicates differential abundance and FALSE indicates no differential abundance.
